# Supplementary material for: Optically active helical vinylbiphenyl polymers with reversible thermally induced stereomutation
Source: Royal Society of Chemistry journal article supplement (doi:10.1039/c6py00447d), 2016-01-01
Supplement: c6py00447d1.pdf [file c6py00447d1.pdf]

## Supporting Information

### Optically Active Helical Vinylbiphenyl Polymers with Reversible Thermally Induced Stereomutation

Rong Wang, Yijun Zheng, Xiaofu Li, Junxian Chen, Jiayi Cui, Jie Zhang, Xinhua Wan\*

Beijing National Laboratory for Molecular Sciences, Key Laboratory of Polymer Chemistry and Physics of Ministry of Education, College of Chemistry and Molecular Engineering, Peking University, Beijing 100871, China

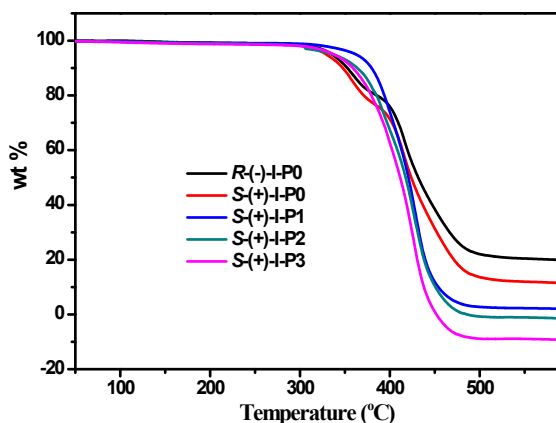

**Figure S1.** TGA thermograms of *S*-(+)-I-Pm/*R*-(−)-I-P0 recorded at a heating rate of 20 °C/min under nitrogen atmosphere

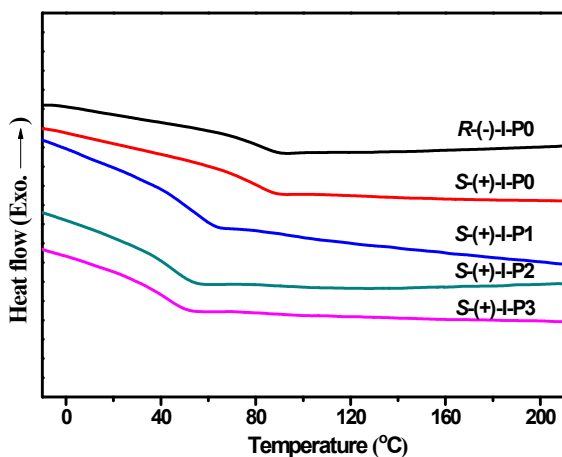

**Figure S2.** DSC curves of *S*-(+)-I-Pm/*R*-(−)-I-P0 recorded during the second heating scanning at a rate of 20 °C/min under nitrogen atmosphere

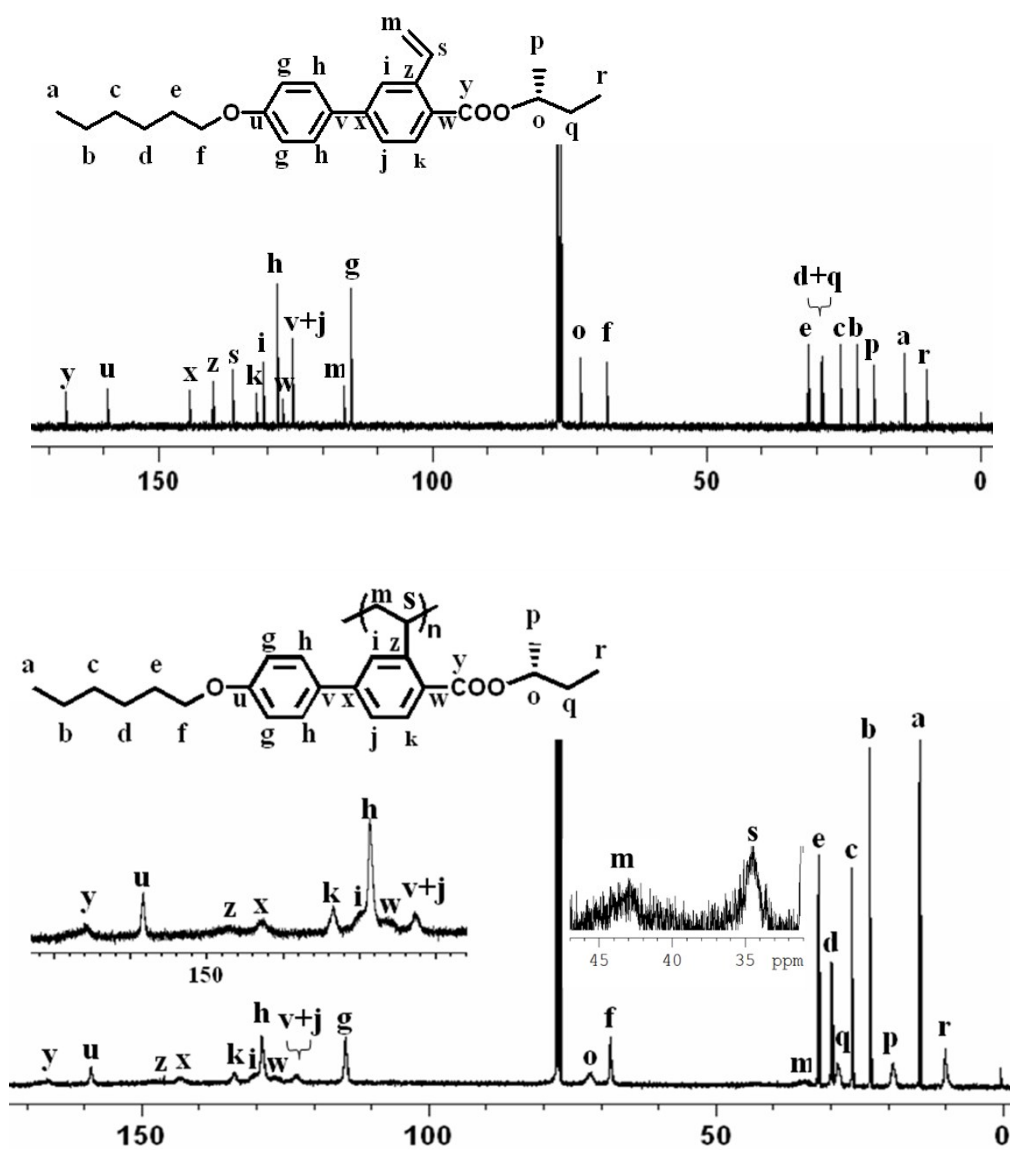

**Figure S3.**  $^{13}\text{C}$  NMR spectra of *R*-(-)-I-MO (upper) and *R*-(-)-I-PO (lower) recorded in  $\text{CDCl}_3$  at 25  $^\circ\text{C}$ .

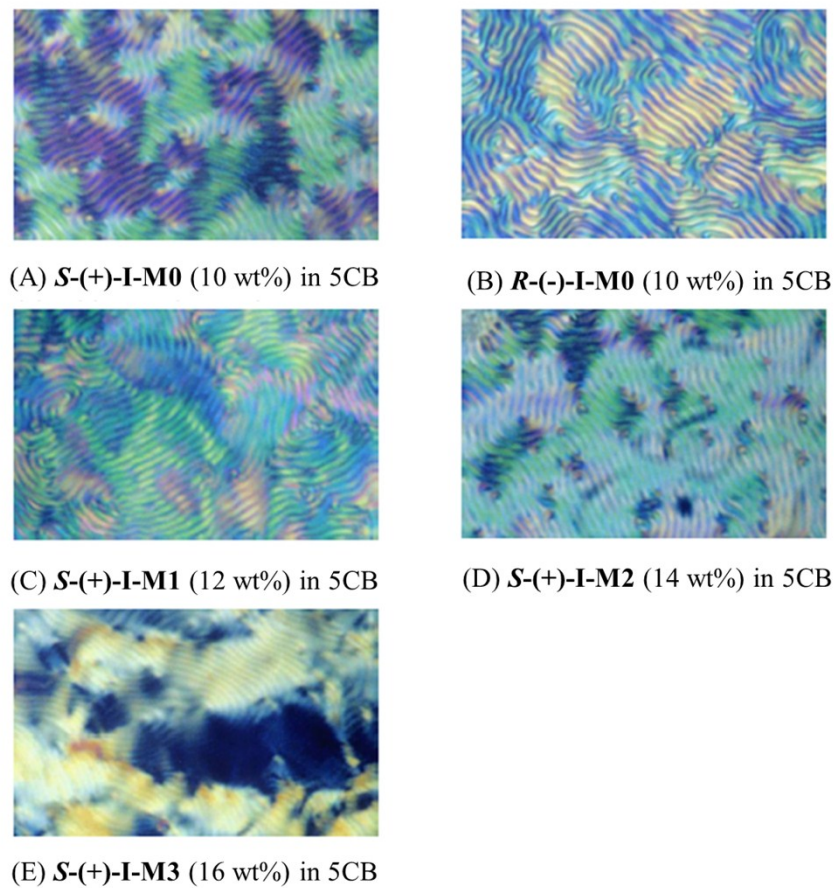

**Figure S4.** Fingerprint textures of **5CB** doped with *R*-(-)-**I-M0**/*S*-(+)-**I-Mm** (10 wt%),  $p \approx 7.5 \mu\text{m}$ . Taken under cross-polarized optical microscope at 20 °C

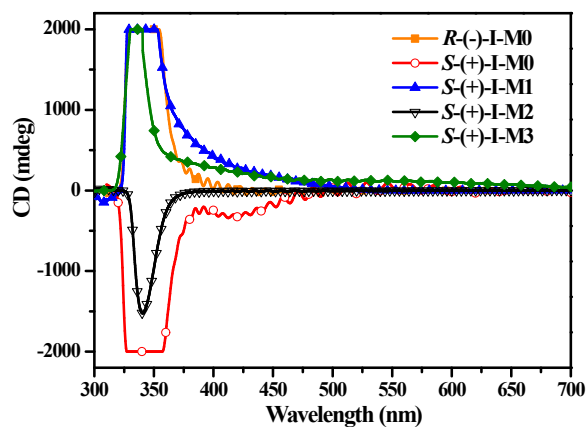

**Figure S5.** CD spectra of induced cholesteric phases of **5CB** doped with *R*-(-)-**I-M0**/*S*-(+)-**I-Mm** at 20 °C

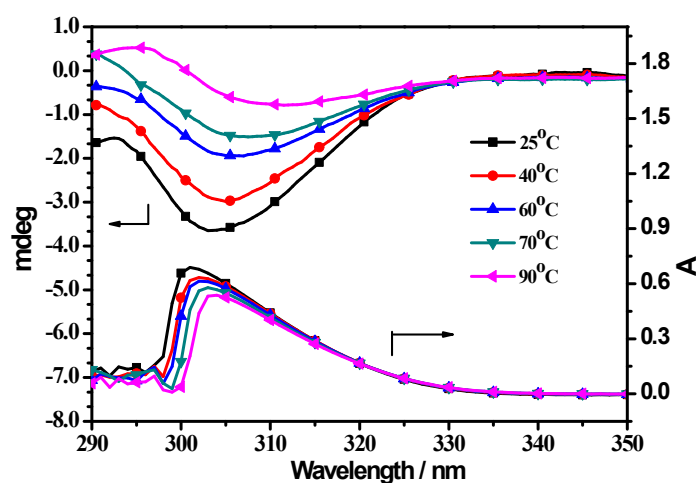

**Figure S6.** Temperature variable CD spectra of **S-(+)-I-P0** in anisole Quartz cell: 1 mm in thickness (c 0.4 mM)

**Table S1.** Chiroptical properties of polymers prepared at 25°C<sup>a</sup>

| Monomer    | $[\alpha]_{365}^{25} (^{\circ})^b$ | Polymer    | $[\alpha]_{365}^{25} (^{\circ})^f$ |
|------------|------------------------------------|------------|------------------------------------|
| R-(-)-I-M0 | -77.6                              | R-(-)-I-P0 | 160.0                              |
| S-(+)-I-M0 | 89.2                               | S-(+)-I-P0 | -139.0                             |
| S-(+)-I-M1 | 14.3                               | S-(+)-I-P1 | -53.1                              |
| S-(+)-I-M2 | 0.7                                | S-(+)-I-P2 | 5.1                                |
| S-(+)-I-M3 | 16.1                               | S-(+)-I-P3 | 12.0                               |

<sup>a</sup> Polymerization condition: solvent, anisole; temperature, 25 °C; monomer concentration, 20 wt%; initiator, BPO; [M]/[I]= 250. <sup>b</sup> Specific optical rotation of monomer in unit of degree was measured in a 1 dm cell at a concentration of ca. 2.0 mg/mL in THF at 25 °C. <sup>f</sup> Specific optical rotation of polymer in unit of degree was measured in a 1 dm cell at a concentration of ca. 2.0 mg/mL in THF at 25 °C.
